# Supplementary material for: Forum: Russia, Europe and the colonial present: the power of everyday geopolitics
Source: Copernicus journal article supplement (doi:10.5194/gh-78-429-2023), 2023-09-05
Supplement: Supplementary file 1 [file gh-78-429-2023-supplement.pdf]

Supplement of Geogr. Helv., 78, 429–451, 2023  
<https://doi.org/10.5194/gh-78-429-2023-supplement>  
© Author(s) 2023. CC BY 4.0 License.

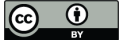

+ GEOGRAPHICA  
HELVETICA + supported by  
sc | nat

*Supplement of*

## **Forum: Russia, Europe and the colonial present: the power of everyday geopolitics**

**Stefan Bouzarovski et al.**

*Correspondence to:* Stefan Bouzarovski ([stefan.bouzarovski@manchester.ac.uk](mailto:stefan.bouzarovski@manchester.ac.uk))

The copyright of individual parts of the supplement might differ from the article licence.

**Supplement.** The Board of Trustees of the Russian Geographical Society,  
2022-23 *Composition of the Board of Trustees\**:

1. Vladimir Putin\*, President of the Russian Federation, Chairman of the Board of Trustees of the Russian Geographical Society
2. Sergei Shoigu\*, Minister of Defence of the Russian Federation, President of the Russian Geographical Society
3. Alexander Abramov\* (Evraz)
4. Maxim Akimov (Russian Post)
5. Petr Aven\* (Alfa-Bank)
6. Vagit Alekperov\* (Lukoil)
7. Oleg Belozеров\* (Russian Railways)
8. Andrei Bokarev\* (TransMashHolding)
9. Anton Vaino\* (Chief of Staff of the Presidential Executive Office)
10. Viktor Vekselberg\* (Renova Group)
11. Senator Yuri Vorobyov\* (Vologda oblast, ex-Deputy Minister under Sergei Shoigu)
12. Filaret Galchev (Eurocement Group)
13. Herman Gref\* / Hermann Gräf (Sberbank)
14. Alexey Gromov\* (First Deputy Chief of Staff of the Presidential Executive Office)
15. Oleg Deripaska\* (Basic Element)
16. Alexander Dyukov\* (Gazprom Neft)
17. Vladimir Evtushenkov\* (AFK Sistema)
18. Sergei Ivanov\* (Russian President's Special Representative for Environment and Ecology, ex-Chief of Staff of the Presidential Executive Office)
19. Vladimir Komlev\* (National Payment Card System)
20. Andrei Kostin\* (VTB Bank)
21. Sergei Lavrov\* (Foreign Minister)
22. Alexander Kozlov\* (Minister for Natural Resources and Ecology)
23. Jack Ma (Alibaba Group)

24. Senator Valentina Matvyienko\* (St. Petersburg, and Chairperson of Russia's Federation Council)
25. Alexey Miller\* /Millier (Gazprom)
26. Leonid Mikhelson\* (Novatek)
27. Dmitry Peskov\* (Deputy Chief of Staff of the Presidential Executive Office)
28. Vladimir Potanin\* (Norilsk Nickel)
29. Alexey Rakhmanov\* (United Shipbuilding Corporation)
30. Viktor Sadovnichiy\* (Rector of Lomonosov Moscow State University)
31. Igor Sechin\* (Rosneft), Sergei Sobyenin (Mayor of Moscow)
32. Gennady Timchenko\* (Novatek)
33. Nikolai Tokarev\* (Transneft)
34. Alisher Usmanov\* (USM Holdings)
35. Tigran Khudaverdyan\* / Chudaverdjan (Yandex)
36. Sergei Chemezov\* (Rostec)
37. Konstantin Chuychenko\* (Justice Minister)
38. Nikolai Shulginov\* (Energy Minister)
39. Petr / Peter Fradkov\* (Promsvyazbank)
40. Viktor Khmarin\* (RusHydro)

Note: \*Person named in one or several of international personal sanctions lists as of 11 March 2023, including:

- United Nations - United Nations Sanctions List;
- United States of America - OFAC Consolidated Sanctions List;
- United States of America - OFAC Specially Designated Nationals List;
- European Union - Financial Sanctions List;
- United Kingdom - Sanctions List;
- United Kingdom - HMT Financial Sanctions List;
- Australia - DFAT Consolidated Sanction List;
- Switzerland - SECO Sanction List;
- INTERPOL Wanted List;
- Canada - Consolidated Canadian Autonomous Sanctions List;
- United States of America - Bureau Of Industry And Security List;
- United States of America - Department Of State AECA Debarred List;
- United States of America - Department Of State Nonproliferation Sanctions List;
- World Bank - Ineligible Firms And Individuals List;
- Other Lists.

Source: Author's own analysis on the basis of the Russian Geographical Society (2013-2023).  
*The Society: Structure: Board of Trustees*, St. Petersburg and Moscow,  
<https://www.rgo.ru/en/society/structure/board-trustees>; Russian Geographical Society  
(2013-2023). *O nas: Struktura: Popechitel'skii sovet*, St. Petersburg and Moscow,  
<https://www.rgo.ru/ru/obshchestvo/struktura/popechitelskiy-sovet>; and NameScan (2023).  
*Free Sanction Lists Search*, Chatswood, NSW, Australia,  
<https://namescan.io/freesanctionscheck>
